# Supplementary material for: Stakeholder preferences for smoking cessation support in Queensland, Australia: a mixed methods study to develop attributes and levels for a discrete choice experiment
Source: Research Square preprint supplement (doi:10.21203/rs.3.rs-7930824/v1), 2026-02-18
Supplement: Supplementary file 1 [file 408debe99cd4513ac4388a91.xlsx]

## Sheet: Sheet1
Additional Table 1: Interview questions to guide qualitative interviews
Interview key questions for service users
1.	Can you tell me some positive attributes (features) of smoking cessation support that you have received in the past to help you quit smoking? This might include support from family, friends, or work colleagues.
2.	What could have been improved to better meet your needs?
3.	If you were looking for support to quit smoking, what do you think would make an ideal smoking cessation support program for adult smokers?
4.	What is your perception around having a smoking cessation support program that includes SMS support?
5.	What do you think may be some of the barriers (unhelpful things) and facilitators (helpful things) to accessing smoking cessation support that meets the needs of adult smokers?
6.	Is there anything else you wanted to say about smoking cessation (quit) support and your experience with it?
Modified interview key questions for service users
1.	Can you tell me about any experiences you’ve had quitting smoking?
2.	What helped you to quit smoking? (if currently quit)
	What do you think might help you to quit smoking? (if currently smoking)
3.	If you’ve managed to quit in the past, what has helped you to stay that way?
4.	What are your thoughts on Biofeedback to support quitting (e.g., checking how much carbon monoxide is in your breath, or chemicals from cigarettes in your saliva)?
5.	What do you think may be some of the barriers (unhelpful things) and facilitators (helpful things) to accessing smoking cessation support that meets the needs of adult smokers?
6.	If you were looking for support to quit smoking, what do you think would make an ideal smoking cessation support program for adult smokers?
7.	Is there anything else you wanted to say about smoking cessation (quit) support and your experience with it?
Interview key questions for providers
1.	Tell me about your role in smoking cessation?
2.	What are some positive attributes (features) of the current model of smoking cessation support you provide to smokers?
3.	What could be improved about the current model of smoking cessation support you provide to smokers?
4.	What factors are important for delivering smoking cessation services?
5.	Are there any additional attributes (features) of an ideal smoking cessation support model from a service provider or system level perspective?
6.	What is your perception around having a smoking cessation service that includes other service modalities e.g., Counselling support delivered via SMS vs telephone call; extra support between counselling contacts e.g., facts and motivational messages via SMS or in short videos?
7.	What do you think may be some of the barriers and facilitators to providing ideal smoking cessation support that meets the needs of adult smokers?
8.	Is there anything else you wanted to say about smoking cessation support and your experience with it?
Modified interview key questions for providers
1.	Tell me about your role in smoking cessation?
2.	Tell me about some successes you’ve experienced in your role in smoking cessation?
3.	What are your thoughts about how the harm of smoking could be reduced?
4.	What do you think could be improved from a service/ organisational level to support smoking cessation?
5.	Tell me your thoughts about the first contact with a service user.
6.	Tell me your thoughts on using biofeedback as a cessation tool?
7.	What do you think may be some of the barriers and facilitators to providing ideal smoking cessation support that meets the needs of adult smokers?
8.	Is there anything else you wanted to say about smoking cessation support and your experience with it?
Optional additional questions for service users and providers
1.	What are some positive attributes (features) of the current model of smoking cessation support you work with or provide to smokers?
2.	What factors do you think are important for delivering smoking cessation services?
Additional Table 2: Characteristics of The Expert Panel members
Expert panel members
1.	Community representative. Ex-smoker for 6 months. Has previously accessed Quitline for cessation support
2.	Community representative. Current daily smoker reducing tobacco use with intention to quit. Has previously accessed Quitline for support
3.	Senior behavioural scientist- Independent organisation
4.	Service Manager
5.	Principal policy officer- Government department
6.	Public health researcher- tobacco policy and smoking cessation
7.	Applied epidemiologist and Senior Research Fellow
8.	Executive Director- Government department
Other attendees
9.	Chair. PhD candidate
10.	Moderator. Qualitative researcher in implementation science
11.	Observer. Health economist and DCE methods expert
12.	Observer. Health Economist and DCE methods expert
Additional Table 3: Participant recruitment for attribute development
Stage 2: Qualitative interviews
	SMS or email invitation to participate sent		Screened (responded to invitation)	Provided written consent		Refused (declined participation or did not respond to further contact)		Ineligible	Lost to follow up (did not respond to further contact after providing written consent)		Completed interview
Total	1494		50	25		24		1	7		18
Service users	1443		36	15		21		0	6		9
Providers	49		14	10		3		1	1		9
Organisationsa	2		N/Ab
Recruitment and interviewing took place between November 2023 and March 2024
aService organisations were sent invitation emails with study information to disseminate to relevant providers and service users. We have reported the number of organisations contacted, but are unable to report on the number of individuals reached through this method of recruitment
bInvitation respondents reported in aggregate for providers and service users
Stage 3: Prioritisation exercise survey
		Screened (sent a survey link)			Opened survey link		Consented to participation			Completed ranking exercise
Total		888			189		164			137
Service users		858			150		135			116
Providers		28			39		29			21
Organisations		2			N/A
Recruitment and survey completion took place in July 2024
Service organisations were sent invitation emails with study information to disseminate to relevant providers and service users. We have reported the number of organisations contacted, but are unable to report on the number of individuals reached through this method of recruitment
Stage 4: Expert panel discussion recruitment
		Screened			Provided written consent		Refused			Participated in panel discussion
Total		11			6a		3			8
Service users		2			2		0			2
Providers		9			4a		3			6
Expert panel discussion took place in August 2024
aTwo panel members did not provide written consent as they were members of the investigatory team
Additional Table 4: Characteristics of participants who took part in qualitative interviews and structured prioritisation exercise.
Characteristics	Total (n=155)	Individual interviews			Prioritisation exercise
		Service users	Service providers	Total	Service users	Service providers (n=21)	Total
		(n=9)	(n=9)	(n=18)	(n=116)		(n=137)
Gender
Females	107	6	5	11	81	15	96
Males	46	3	3	6	35	5	40
Non-binary/ other	1	0	1	1	0	0	0
Declined answer	1	0	0	0	0	1	1
Age
18-25	23	1	1	2	19	2	21
26-35	28	2	1	3	23	2	25
36-45	34	2	1	3	27	4	31
46-55	37	1	4	5	23	9	32
56-65	21	2	2	4	15	2	17
66-75	11	1	0	1	9	1	10
Declined answer	1	0	0	0	0	1	1
Ethnicitya
Australian Aboriginal	14	0	1	1	13	0	13
Torres Strait Islander	1	0	0	0	1	0	1
Australian South Sea Islander	1	0	0	0	1	0	1
Australian	47	3	1	4	38	5	43
Oceanianb	6	0	0	0	6	0	6
North-West European	49	6	7	13	29	7	36
Southern and Eastern European	2	0	0	0	2	0	2
North-East Asian	2	1	0	1	1	0	1
South-East Asian	1	0	0	0	1	0	1
North African and Middle Eastern	1	0	0	0	1	0	1
Sub-Saharan African	1	0	0	0	0	1	1
Declined answer	40	1	1	2	30	8	38
Geographic locationc
Major city	83	6	8	14	55	14	69
Inner regional	32	2	1	3	27	2	29
Outer regional	26	1	0	1	24	1	25
Remote	6	0	0	0	6	0	6
Very remote	2	0	0	0	2	0	2
Declined answer	6	0	0	0	2	4	6
Ever smoked tobacco (service providers only)
Yes	16	N/A	5	5	N/A	11	11
No	13	N/A	4	4	N/A	9	9
Declined answer	1	N/A	0	0	N/A	1	1
Smoked 100 cigarettes in lifetime
Yes	132	9	3	12	113	7	120
No	7	0	2	2	2	3	5
Unsure	1	0	0	0	0	1	1
Declined answer	1	0	0	0	1	0	1
a May identify as more than one ethnicity. Categorised according to Australian Standard Classification of Cultural and Ethnic Groups. Australian ethnicities provided in detail, all other ethnicities categorised according to broader Ethnic groups [74]
b Other Oceanian not including Australian Ethnic groups
c Geographic location based on postcode data collected from participants, according to the Australian Bureau of Statistics [75]
Additional Table 5: Attributes ranked in the top ten preferred attributes in the prioritisation exercise that were excluded by The Expert Panel, and reasons for exclusion
Excluded attributes (as presented in the prioritisation exercise)	Respondent group	Ranked order (out of 20)	Reasons for exclusion
Readiness to quit smoking assessment (i.e., checking that it’s the right time for you to quit)	Service users	Second most important	Readiness to quit smoking assessment should take place prior to initiating a quit support plan [76]. There are a number of approaches and tools to evaluate readiness, including nicotine dependence, level of motivation to make a quit attempt, and potential enablers and barriers to quitting [76-81]. Our DCE evaluates preferences for cessation support, which should occur after an initial readiness a…
	Service providers	Second most important
The person who provides the smoking cessation/ quit support (e.g., counsellor, GP, psychologist)	Service users	Sixth most important	The panel agreed that the approach of the provider to convey empathy and build rapport is an integral element of the attribute describing the person who provides the cessation support [83]. The panel conceded that the dynamic between providers specific training, qualifications, and skillset, and their ability to establish and maintain rapport will be explored in more detail through qualitative in…
	Service providers	Fifth most important
Tailoring (i.e., support is adjusted to suit your situation and needs)	Service users	Ninth most important	The planned DCE will evaluate attributes for smoking cessation support that can be measured quantitatively. The panel consensus was that tailoring cessation support to individual needs and preferences is contextual and nuanced, and more appropriate for qualitative exploration [84]. For example, tailoring support to facilitate quit success includes aligning strategies to an individual’s reasons an…
	Service providers	Third most important
Harm reduction support (e.g., reducing smoking if not ready to quit, using vaping to quit smoking)	Service users	Tenth most important	Harm reduction includes strategies to reduce cigarette consumption for individuals not ready to quit, substituting cigarettes with vapes in a transition to quitting, and using vapes to replace combustible cigarettes for the potential reduction in toxin exposure [86-88]. Harm reduction may be an important public health intervention for individuals who are not ready to quit smoking [89]. The expert…
	Service providers	Ninth most important
