# Supplementary material for: Stakeholder preferences for smoking cessation support in Queensland, Australia: a mixed methods study to develop attributes and levels for a discrete choice experiment
Source: Research Square preprint supplement (doi:10.21203/rs.3.rs-7930824/v1), 2026-02-18
Supplement: Supplementary file 2 [file 5daadb626bcb118b5d64711e.xlsx]

## Sheet: Sheet1
Table 1: Participant quotes aligning to attributes and categories for cessation support developed from qualitative interviews.
Category	Attributes within the category
Access	1. Distance to service 2. Hours of service 3. Wait time 4. Cost 5. Eligibility for services
Participant quotes to support the category
“If I had to pay for it, I absolutely would not go. Like, without a doubt, would not go. And, like, I mean, I’m lucky, because my GP is close, like, it’s walking distance. Um, I mean, I drive anyway, but sometimes I don’t have a lot of petrol so if it was, like, a lot of travel I wouldn’t go. If it was going to cost, I wouldn’t go. And also, like, when GPs get really busy, if they say, like, we d…
“It's having the medication there, and it's not cheap. So, um, whilst it's cheap, it – yeah. It's cheaper than cigarettes. I understand that - But when you go out into the chemist and realise how actually expensive, um, getting the patches and the lozenges are, that's a lot of money - and I know you can turn around and say, well, if they don't have the money, why do they spend it on cigarettes? W…
“You have to go to the doctor to get the script, or you have to go and talk to the pharmacist, and you have to pay X number of dollars to - to get it. And I think there's some PBS changes that - that are gonna be really problematic for - not so much for Indigenous people, but for other people having to pay full price for NRT. Um, so that, you know, that's definitely a barrier - smoking is a disea…
“You definitely have people who, um, you know, are financially distressed and they – they – smoking's cost them so much and they've spent all their money, and they say they have no money for the nicotine replacement or, um, so, yeah, there's definitely financial distress. So, people are often looking for something free. And that – that is – that – that is good because it's a way in. So, they – th…
Category	Attributes within the category
Information provision	1. Information content 2. Biofeedback
Participant quotes to support the category
“I’m a big fan of, like – what’s the word? All the, like – just affirming things and keeping people motivated and actually making them feel sort of like they’re achieving something. And it seems silly, but those things are really beneficial to people, and I think, yeah, having that little message to say, keep going, you’re doing really well. You know, you can – you can get through it. We’re here …
“I might also do a smokerlyzer level as well as a bit of an education too. So that's a really, um, great way to sort of help the patients as well to show them what their smokerlyzer carbon monoxide levels are so we can then talk more about, you know, treatment and interventions.” Service provider 1
“The biggest attribute, um, the biggest game changer in any of it would be the smokerlyzer. So, um, and I guess that's something I think has - I'm not sure whether a Quitline service has trialled them or not, but I maybe think maybe has - somebody has, is the individual smokerlyzer that get sent out. So that biofeedback, um, people being able to see where they're at, um, is - is really, really im…
“We don't sit there and tell them about how bad smoking is for them. They already know - They don't – we don't have to tell them that at all - We have to tell them about how, you know, one cigarette's going to wake up those receptors and you're going to want another one - So, we need to give them that kind of education, but we don't tell them how it's bad for them - We'll ask them, why do you wan…
Category	Attributes within the category
Engaging with services	1. Mode of contact 2. Technology-based interventions 3. Format of service
Participant quotes to support the category
“Like, I am much more preferable to texting. And I think – I think that’s a generational thing as well. So, some people might benefit from a phone call, and that’s fine, but I personally – I’m not about to call you and say, hey, I really want a ciggie, can you give me some hot tips right now to take my mind off it.” Service user 1 (current daily smoker)
“I'm not sure if there's, um, places to go, like you know, like rehab for drugs and stuff, like is there rehab for smokers, like – I'm – I'm not sure, I don’t – I don’t believe there is, like from my understanding - but like, that would be awesome if there, you know, maybe was something like that, like a group - of people going to do it at the same time” Service user 2 (Current daily smoker)
“I love, um, telehealth, that’s like - really convenient and I guess you're more likely to do that - and make time to do that, I guess - Than having to, yeah, drive into an appointment.” Service user 2 (current daily smoker)
“I personally prefer to do in person if I can because that's where you're really developing a, um, relationship with the patients... So, I also like to be, um, face-to-face. So usually what I do is I'll try and see, um, how a person particularly learns or understands what I'm talking about, picking up on their cues” Service provider 1
“But they also want things - they also want things to do in the privacy and individual kind of care space. So, it's - it's - it's kind of the - the - the full continuum of I want a group-based thing, but I also want my own, um, ah, my own support or ability to get my own individual support.” Service provider 3
"The only sort of disadvantage I see with, um, one-on-one is you’re often providing education over and over and over, and in a group setting that would be more efficient - If you could get with people face-to-face, and then you can give them the education in a group setting.” Service provider 4
“There's obviously a couple of barriers that, uh, prevent people from not wanting to do telehealth - technology, they're not familiar with it. They don't know — even though Queensland Health has made it very easy for people to do telehealth - some people still don't want to do telehealth because they don't know - Maybe they don't have internet. I've got some patients who said that Internet or Wi-…
Category	Attributes within the category
Tailoring support	1. Harm reduction 2. Managing comorbidities 3. Readiness to make a quit attempt 4. Using vapes 5. Holistic care 6. Individualised support
Participant quotes to support the category
“I don’t think that it should be an isolated thing because, like, it’s – it’s not an isolated issue. It all relates to everything that I’ve got going on. It’s all just one. Like, it should be looked at as a whole approach instead of just smoking. Because if you just tell me to quit smoking because it’s not good for me, great. Stress isn’t good for me either. What are you doing about that?” Servic…
“For me right now, the focus is just getting the amount that I'm smoking down, and in my mind I'll deal with that bridge when I come to it. Um, because it's not something that's immediately on my table right now. Right now I need to just get my tobacco smoking down to – to fewer smokes per day. And once I'm down to that five cigarettes a day, uh, amount that I'm wanting to be at for work, then I …
“I think they should – um, they should ask about the presence of mental health conditions, uh, specifically like schizophrenia, uh, because that may be better done with the aid of Quitline, but mainly by a psychiatrist and GP because you would need to get levels you would actually need bloods. Yeah. Yeah. So it should – it could potentially be diverted over to another service if it's – but also l…
“I think you’ve got to be ready, and you’ve got to have made the decision yourself - that you can’t do it for someone else - you can’t do it because your wife wants you to do it, or your husband wants you to do it - or your friend or whatever - It’s got to be your decision - And yeah, I was ready - which, um, made all the difference.” Service user 9 (ex-smoker)
[Discussing individualised support] “It's a really good stepping stone to something else because you're sorting out the tobacco withdrawals and then you can start looking at are they using methamphetamines? Are they using opiates? ... You know, what else is going on? Do they have trauma history? ... Is there PTSD? Are they anxious, depressed? What medications are they on? And then you're going in…
“I think that there's - we have a really strong position around the risks of vaping, but we don't have a really strong position about the role of vaping to quit smoking. So, you know, there's - there's not the depth of evidence around that. There are absolutely risks around that, but - but I think that we have - because we haven't moved and we haven't been super proactive around the vaping space …
“I say to people, oh, it sounds like you've got so much going on at the moment that you really can't focus on quitting. 'Cause quitting takes a big effort. So, it's completely fine if you can't focus on it now, we can just close the program down. No worries. And you can call us when you're ready - So we – one – if people know that that's how we sort of work with them, I think, once they know that…
“I think it's recognising that the structure works really well, um, for the majority, but also to have options for, um, a different type of conversation with people. And having some, um, resources that guide those conversations for people who, um – yeah, who smoke in a different way or quit for periods of time. So harm minimisation maybe rather than – than quitting. Recognising that – that's, um,…
Category	Attributes within the category
Delivery of services	1. Combined and staged approach 2. Pharmacotherapy 3. Program structure 4. Service data integration
Participant quotes to support the category
“So, he said, ''Right, I'm going to be beside you every step of the way.'' And you know what, he was. And I found that combining both of them, the lozenges and the, um, uh, patches, really worked - But on top of that, I had my – it's not just about one bit of support - It's not just about one bit of medication. I also have the support of my partner. I also have the support of my boys. So, it's – …
“I'm not saying I need somebody one-on-one, because that would be costly... It would be good. But to have an understanding of my background, to be able to, you know, kind of note down from the previous conversations I've had with people, the areas I'm having issues with. I have had a discussion and a good discussion with somebody, that should be ongoing. It's not ongoing. And that's where you get…
“Obviously I think the nicotine replacement therapy or some other way to sort of feed those nicotine receptors in your brain to take care of that physical aspect of it is also super important... and also something that takes care of the psychological aspects of it as well. Like, um – like I said, I'm – I – I'll be getting on the patches, and I'll be getting on the spray, but the main reason for m…
“I gave permission for them to share notes 'cause I'm pretty sure he would need it. So, um, it's great. Before every appointment, my GP just checks up under notes previously written by my psychiatrist. So, they all share notes. Um, it's really useful because it's less explanation. He can – if I talked about some struggle I had with my psychiatrist, my GP can then later on ask me about it in a lat…
“I know that, um, it's really great that we've got a service that actually provides NRT as well… So actually being able to do something practical, not just talking about it, but actually helping people to get an intervention is really important.” Service provider 1
“It needs to be having the solid foundation of the - the services that are going to be, um, consumer-centric and meet consumer needs and expectations in a world where people expect your data to be all connected, but absolutely want privacy and control over their own data” Service provider 3
“The public health response; the multi-strategy response. So, we had, we — we knew from the World Health Organization and from Good Health Promotion - that, uh, if you're trying to shift the behaviour, you have to use a multi-strategy response” Service provider 7
“If not everyone wants to use it, um, talking to an unidentified counsellor is an enabler. Um, the fact, yeah, it’s telephone and we have extended service hours as well and the ability for people to request a call back rather than just, um, having to call us. They want – want to talk to us tomorrow or the next day. Then it’s free obviously, ah, and that we can call people and schedule future call…
Category	Attributes within the category
Provider characteristics	1. Provider approach 2. Provider skills, experience and training
Participant quotes to support the category
“So, you know, like there's not any – well, that I'm aware of, any quit smoking specialists around - that actually have um, you know, the power of a GP - You know, so – you know, like the Quitline helps me a lot, but they can't say, oh, [-Participant name-], okay, well, I'm going to prescribe you this to give up to try to lose some weight. They can't do that. They can't help me in those ways.” Se…
“They did a – a follow-up phone call, um, just last week. Yeah, last week. And that was a lot more, um – a lot more positive - Oh, it was – it was – I suppose it was the approach of the person I was speaking to, but also, you know, supportive in saying, oh, oh, well, you've done – you've done well so far and, you know, this is what – you're making – making good progress. Keep it up, sort of thing…
“Because there's a difference between actually being a tobacco treatment specialist, that you take seriously - And, you know, you stay up to date with the evidence base. There's a real difference. And I think that you can see that when someone is an actual tobacco treatment specialist that - they might get a – a slightly higher level of intervention I guess” Service provider 1
“And so, that non-judgmental listening. And they can talk about the things that go through their head that they can't really talk about with their family. But that, that place for them to have is, I think, so valuable for them. And to just acknowledge that what they're doing is really hard as humans, behaviour change is so hard for all of us, just to normalise the struggle that they're going thro…
Category	Attributes within the category
Self-help	1. Alternative treatments 2. Cold turkey 3. Family, peer support
Participant quotes to support the category
“I read about this one [hypnosis] that said, oh, quit smoking in one day, and I'm thinking, God. It was like expensive as well, you know, and I'm going on, not going to do anything... I went in and I tried it, and I said I walked out, and I didn't have another cigarette again... For four and a half years.” Service user 4 (current daily smoker)
“I gave up for – for – for the fact that – the support they offered... and my family... So I shared with my family the program I was going on... I opened it up to them and I said, I need your support... I need you to be here for me and to check in on me, uh, quite regularly.” Service user 5 (ex-smoker)
“But that would be obviously the ideal situation to have somebody like having smoked – a quit smoking buddy or something like that. He could just check in with you regularly and be like, okay, what are you doing today? You know, how many smokes you had today? Right. Even if it's just something as simple as that, makes you stop and physically think about how many smokes you've actually had today.”…
“Down in our foyer, they had, um, the – they had business cards for a hypnotism service - Like, uh, no, you can't be advertising - hypnotism business – private business in a hospital. - So I was like, what's this? What is this? 'Cause there's no evidence that that actually works. You know, if people – if somebody pays a thousand bucks, they might be more committed than somebody else. You know, th…
“Is that wanting to know that other people have quit or how other people have done it. And kind of knowing, you know, that - that other people have done it, says that I might be able to do it too. Um, and so we also see that with our, I can quit forum among people who smoke, being able to share tips and experience and be able to support each other. So there's that real kind of, um, community of p…
Table 2: Attributes list developed from stages one and two for use in the prioritisation exercise and subsequently presented to The Expert Panel.
Below is a list of things that are offered by some smoking programs to help people quit smoking. If you were able to choose from the list below, what do you think would be the 10 most important things to help you to quit smoking? There are 20 items to choose from. We want to know what you think are the 10 most important.
	Attribute
1.	Tools and resources to help you quit (e.g., medications such as nicotine replacement therapy, monitors to measure the toxins from cigarettes in your breath and saliva)
2.	Readiness to quit smoking assessment (i.e., checking that it’s the right time for you to quit)
3.	Cost (i.e., whether the service is free or if you have to pay out of pocket)
4.	Format of counselling/ quit support (e.g., one-on-one support, group counselling and support)
5.	Complementary and alternative therapies (e.g., hypnotherapy, acupuncture, naturopathy)
6.	Tailoring (i.e., support is adjusted to suit your situation and needs)
7.	The person who provides the smoking cessation quit support (e.g., counsellor, GP, psychologist)
8.	Program structure (e.g., you can contact the service for support when you need it, or a Quit program with regular scheduled contact booked in advance)
9.	Harm reduction support (e.g., reducing smoking if not ready to quit, using vaping to quit smoking)
10.	How you are contacted (e.g., phone, text message, video call, in-person)
11.	Quit support built into other services you visit (e.g., GP clinic, hospital outpatient clinics)
12.	Support for other needs (e.g., support for diabetes, diet and weight, mental health as part of smoking cessation support)
13.	Being known to the service (i.e., not having to repeat your personal information/ smoking history each time you contact the service)
14.	Services for certain populations (e.g., people on low incomes, in rural or remote regions, Aboriginal and Torres Strait Islander people, parents of children)
15.	Program topics (e.g., encouragement, information about how to quit, what to expect when quitting)
16.	How your information is protected (e.g., if your information is able to be shared with other healthcare providers)
17.	Whether there is a wait time for an appointment
18.	Opening hours (e.g., service open on weekends or after hours)
19.	Support specifically for quitting vaping
20.	Distance to service (how far from your home if the support is in-person)
Here are the 10 most preferred attributes (“things”) you selected. Please rank them in order of what you think is the most important and least important for support to quit smoking.
Attribute		Rank
<10 most preferred attributes selected in the previous stage appear here>		1. (Most important)
		2
		3
		4
		5
		6
		7
		8
		9
		10. (least important)
Table 3: Final attributes and levels for inclusion in the DCE survey
Attribute	Attribute description	Attribute levels
Medications	What medications would you prefer, and for how long?	None
		Medications to reduce cravings e.g., Varenicline - for 2 months
		Medications to reduce cravings e.g., Varenicline - for 3 months
		Medications to reduce cravings e.g., Varenicline - for 6 months
		Nicotine replacement therapy (NRT) - for 2 months
		Nicotine replacement therapy (NRT) - for 3 months
		Nicotine replacement therapy (NRT) - for 6 months
		Nicotine replacement therapy (NRT) + medication to reduce cravings e.g., Varenicline - for 2 months
		Nicotine replacement therapy (NRT) + medication to reduce cravings e.g., Varenicline - for 3 months
		Nicotine replacement therapy (NRT) + medication to reduce cravings e.g., Varenicline - for 6 months
Support	How would you like to receive support?	Telephone call one-on-one with a smoking cessation professional
		Messaging or online chat one-on-one with a chatbot/ AI
		Video-call one-on-one with a smoking cessation professional
		Video-call with a group of other people on their quit journey, moderated by a smoking cessation professional
		Messaging or online chat one-on-one with a smoking cessation professional
		Messaging or online chat forum with a group of other people on their quit journey, moderated by a smoking cessation professional
		In-person one-on-one with a smoking cessation professional
		In-person with a group of other people on their quit journey, moderated by a smoking cessation professional
Distance	How far would you be willing to travel in total to and from the service?	More than 100km
		100 km
		40km
		10 km
		No travel
Contact	How would you prefer to have contact with the service?	You can contact the service for support as needed. You won’t be contacted unless you request it
		You will be contacted at scheduled times and intervals that suit you
Additional	What other supports would you prefer in addition to support to quit smoking/ vaping?	No additional support
		Advice on complementary and alternative therapies e.g., acupuncture, hypnosis, naturopathy
		Support or advice for other health needs e.g., diabetes, weight management, mental health
Tools	What self-directed tools would you prefer in addition to support to quit smoking/ vaping?	No self-directed tools
		Mobile app with "Quit tips" and strategies to help cope with cravings
		Text messages with "Quit tips" and strategies to help cope with cravings sent to your phone
Cost	How much would you be willing to pay for this program?	40
		10
		$0 No cost
